# Supplementary material for: Whole Exome Sequencing Is the Minimal Technological Approach in Probands Born to Consanguineous Couples
Source: MDPI journal article supplement (doi:10.3390/genes12070962), 2021-06-24
Supplement: s1 [file s1]

|                                                                    |                                               |
|--------------------------------------------------------------------|-----------------------------------------------|
| WES enrichment kit                                                 | Twist Human Core Exome Kit (Twist Bioscience) |
| Sequencing platform                                                | NovaSeq 6000                                  |
| No. reads Patient 2                                                | 175,404,144                                   |
| No. reads Mother                                                   | 186,141,652                                   |
| No. reads Father                                                   | 179,763,744                                   |
| Mean Read length                                                   | 100 bp                                        |
| Duplication rate                                                   | 8.29%                                         |
| Average depth on target                                            | 151X                                          |
| Total number of variants                                           | 105,421                                       |
| Variants with effect on CDS or affecting splice sites <sup>1</sup> | 9,920                                         |
| Unknown/low (<0.1%) frequency functional variants                  | 831                                           |
| Filtered disease genes (de novo)                                   | 3                                             |
| Filtered disease genes (recessive trait)                           | 37                                            |

**Supplementary Table S1.** WES data output; <sup>1</sup>High quality non synonymous SNPs and indels within coding sequence and splice sites (+/-8).

| Location                  | Gene          | RefSeq         | c.DNA                          | Protein        | Max AF   | ACM | Effect     | Polyphen 2.0      | SIFT  | Gene function <sup>1</sup>                                                                                 |
|---------------------------|---------------|----------------|--------------------------------|----------------|----------|-----|------------|-------------------|-------|------------------------------------------------------------------------------------------------------------|
| <i>De novo</i>            |               |                |                                |                |          |     |            |                   |       |                                                                                                            |
| 1:221057901               | <i>HLX</i>    | NM_021958.3    | c.1322G>A                      | p.(Ser441Asn)  | -        | VUS | Missense   | Benign            | 0.004 | Th1 lymphocytes maturation (transcription factor)                                                          |
| 3:137892399               | <i>DBR1</i>   | NM_016216.3    | c.267T>G                       | p.(Asn89Lys)   | -        | VUS | Missense   | Damaging          | 0.002 | RNA splicing                                                                                               |
| 20:44869664               | <i>CDH22</i>  | NM_021248.2    | c.488A>T                       | p.(Asp163Val)  | -        | VUS | Missense   | Damaging          | 0.0   | Brain-specific cadherin (cell adhesion)                                                                    |
| <i>Homozygous</i>         |               |                |                                |                |          |     |            |                   |       |                                                                                                            |
| 1:152058717               | <i>TCHHL1</i> | NM_001008536.1 | c.1441G>A                      | p.(Val481Met)  | 0.000147 | VUS | Missense   | Benign            | 0.128 | transition metal ion binding                                                                               |
| 5:35871220                | <i>IL7R</i>   | NM_002185.3    | c.442G>C                       | p.(Val148Leu)  | 0.000599 | VUS | Missense   | Benign            | 0.142 | T cells lymphopoiesis (interleukin receptor)                                                               |
| 5:156566228               | <i>MED7</i>   | NM_004270.4    | c.215T>A                       | p.(Phe72Tyr)   | 0.000136 | VUS | Missense   | Benign            | 0.234 | Cofactor for transcription factor activation                                                               |
| 9:21187392                | <i>IFNA4</i>  | NM_021068.2    | c.139A>G                       | p.(Ile47Val)   | 0.000004 | VUS | Missense   | Benign            | 0.222 | Antiviral immune system activity (interferon)                                                              |
| 9:21481259                | <i>IFNE</i>   | NM_176891.4    | c.435A>T                       | p.(Lys145Asn)  | 0.000799 | VUS | Missense   | Damaging          | 0.003 | Antiviral immune system activity (interferon)                                                              |
| 10:105233226              | <i>CALHM3</i> | NM_001129742.1 | c.779G>A                       | p.(Arg260His)  | -        | VUS | Missense   | Benign            | 0.332 | Subunit of ion channel involved in taste perception                                                        |
| 11:1579393                | <i>DUSP8</i>  | NM_004420.2    | c.646A>G                       | p.(Asn216Asp)  | -        | VUS | Missense   | Probably damaging | 0.032 | Putative regulator of MAPK activity                                                                        |
| 11:102573534              | <i>MMP27</i>  | NM_022122.2    | c.569G>A                       | p.(Gly190Asp)  | 0.000004 | VUS | Missense   | Damaging          | 0.025 | Endometrial-specific matrix metalloproteinase (mestruation)                                                |
| 11:119050726              | <i>NLRX1</i>  | NM_024618.3    | c.1996G>A                      | p.(Gly666Ser)  | 0.000799 | VUS | Missense   | Benign            | 0.66  | Antiviral signaling regulation                                                                             |
| 12:113530981              | <i>DTX1</i>   | NM_004416.2    | c.956C>T                       | p.(Pro319Leu)  | 0.000004 | VUS | Missense   | Probably damaging | 0.008 | Putative regulation of Notch in neurogenesis, lymphogenesis and myogenesis (ubiquitin ligase)              |
| 13:41704962               | <i>KBTBD6</i> | NM_152903.4    | c.1686C>G                      | p.(Ile562Met)  | 0.000012 | VUS | Missense   | Probably damaging | 0.001 | Ubiquitin ligase                                                                                           |
| 13:42142409               | <i>VWA8</i>   | NM_015058.1    | c.5642T>C                      | p.(Phe1881Ser) | 0.000998 | VUS | Missense   | Damaging          | 0.003 | Uncharacterized ATPase                                                                                     |
| 16:12875066               | <i>CPPED1</i> | NM_018340.2    | c.265G>A                       | p.(Gly89Ser)   | 0.000241 | VUS | Missense   | Damaging          | 0.007 | Pro-apoptotic phosphatase                                                                                  |
| 17:7240058                | <i>ACAP1</i>  | NM_014716.3    | c.5C>T                         | p.(Thr2Met)    | 0.000028 | VUS | Missense   | Damaging          | 0.037 | Clathrin-dependent export from recycling endosomes                                                         |
| 17:7609035                | <i>EFNB3</i>  | NM_001406.3    | c.119_120insGA<br>GGTGAGTGGCCT | p.(Phe42fs*0)  | 0.000044 | VUS | Frameshift |                   |       | Brain-specific ephrin, receptor tyrosine kinases involved in neuronal, vascular and epithelial development |
| 17:80676838               | <i>FN3KRP</i> | NM_024619.3    | c.198_199insA                  | p.(Thr67fs*46) | 0.000521 | VUS | Frameshift |                   |       | Protects proteins from non-enzymatic glycation                                                             |
| 22:24951775               | <i>GUCD1</i>  | NM_001284251.1 | c.19C>T                        | p.(Arg7Cys)    | 0.000014 | VUS | Missense   | Benign            | 0.0   | Family of proteins involved in GTP conversion to cGMP                                                      |
| <i>Recessive Compound</i> |               |                |                                |                |          |     |            |                   |       |                                                                                                            |
| 19:14184539               | <i>MISP3</i>  | NM_001291291.1 | c.418C>T                       | p.(Arg140Trp)  | -        | VUS | Missense   | Benign            | 0.026 | Uncharacterized protein                                                                                    |
| 19:14184611               | <i>MISP3</i>  | NM_001291291.1 | c.490C>A                       | p.(Arg164Ser)  | 0.007836 | VUS | Missense   | Probably damaging | 0.0   | Uncharacterized protein                                                                                    |

**Supplementary Table S2.** Rare variants of uncertain significance found in case 2. *IL7R* is associated with Severe combined immunodeficiency, T-cell negative, B-cell/natural killer cell-positive type (OMIM #608971), a condition with early manifestations that were absent in case 2. The other genes are not known to be disease-causing. <sup>2</sup>Sources: OMIM, UNIPROT, Human Protein Atlas, GeneOntology
